# Supplementary material for: Overexpression of microRNA-211 in Functional Dyspepsia via Downregulation of the Glial Cell Line-Derived Neurotrophic Factor (GDNF) by Increasing Phosphorylation of p38 MAPK Pathway
Source: Can J Gastroenterol Hepatol. 2022 Dec 14;2022:9394381. doi: 10.1155/2022/9394381 (PMC9771656; doi:10.1155/2022/9394381)

Supplementary Table 1. PCR primers for GAPDH and GDNF.

| Primer | Forward | Reverse |
| --- | --- | --- |
| GAPDH | 5’-acggcaagttcaacggcacagtca-3’ | 5’-ccacgacatactcagcaccagcatca-3’ |
| GDNF | 5’-atgtcgtggctgtctgcctggtgtt-3’ | 5’-ttcgaggaagtgccgccgcttgtt-3’ |
| RNU48 | 5’-agtgatgatgaccccaggtaa-3’ | 5’-gtgatggcatcagcgacaca-3’ |

All primers were purchased from Origene, Rockville, MD.

**Supplementary Table 2.** Raw data of QPCR results of miR-211 and GDNF of human duodenal biopsy tissue specimens from control and FD groups (n=20 for each).

| | miR-211 |  |  | GDNF |  | | --- | --- | --- | --- | --- | | Ctrl | FD |  | Ctrl | FD | | 1.4142 | 1.2142 |  | 1.0158 | 0.3727 | | 1.6935 | 0.79 |  | 0.8033 | 0.5491 | | 0.5864 | 2.0705 |  | 0.6358 | 0.5687 | | 0.473 | 0.361 |  | 0.5683 | 0.3054 | | 0.5396 | 0.895 |  | 1.1991 | 0.2734 | | 1.3104 | 1.4439 |  | 0.6696 | 0.8403 | | 0.5987 | 1.9588 |  | 0.6589 | 0.5424 | | 0.933 | 1.8532 |  | 0.638 | 0.3561 | | 1.6133 | 1.0867 |  | 0.3604 | 0.4853 | | 0.4506 | 1.9319 |  | 0.3989 | 0.5645 | | 0.7684 | 2.8481 |  | 0.7412 | 1.1221 | | 1.9588 | 1.1567 |  | 0.4717 | 0.4172 | | 1.4241 | 2.1585 |  | 2.2473 | 0.4289 | | 0.6462 | 2.2501 |  | 1.7181 | 0.3759 | | 0.5743 | 0.6507 |  | 2.8747 | 0.5042 | | 1.4743 | 1.6702 |  | 0.2862 | 0.2079 | | 0.8123 | 1.4641 |  | 0.7074 | 0.0786 | | 1.1096 | 0.7684 |  | 0.8034 | 0.1859 | | 0.9727 | 1.879 |  | 1.8974 | 0.3937 | | 1.257 | 1.7291 |  | 0.3175 | 0.8154 | |  |
| --- | --- | --- | --- | --- | --- | --- | --- | --- | --- | --- | --- | --- | --- | --- | --- | --- | --- | --- | --- | --- | --- | --- | --- | --- | --- | --- | --- | --- | --- | --- | --- | --- | --- | --- | --- | --- | --- | --- | --- | --- | --- | --- | --- | --- | --- | --- | --- | --- | --- | --- | --- | --- | --- | --- | --- | --- | --- | --- | --- | --- | --- | --- | --- | --- | --- | --- | --- | --- | --- | --- | --- | --- | --- | --- | --- | --- | --- | --- | --- | --- | --- | --- | --- | --- | --- | --- | --- | --- | --- | --- | --- | --- | --- | --- | --- | --- | --- | --- | --- | --- | --- | --- | --- | --- | --- | --- | --- | --- | --- | --- | --- |

**Supplementary Figure 1.** Eosinophil and mast cell counts in duodenal tissue specimens from patients with functional dyspepsia and healthy controls.


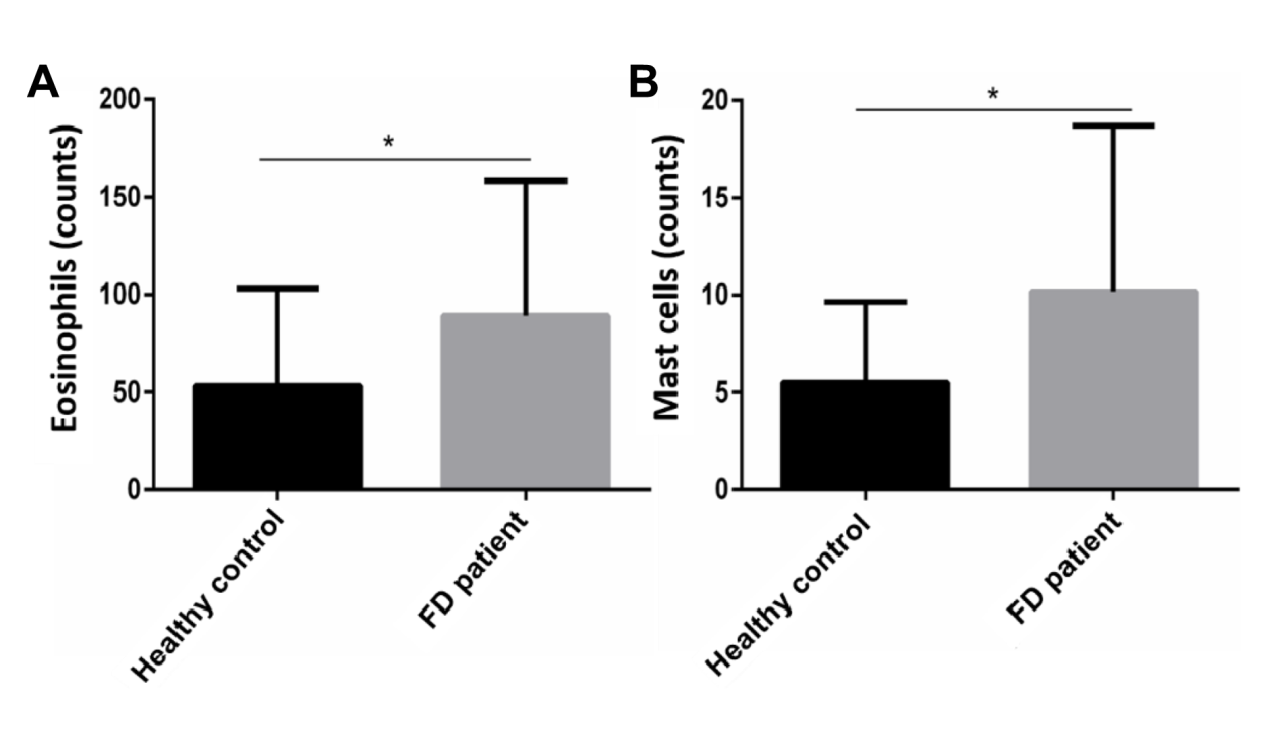

Supplement: Supplementary Materials — Supplementary Table 1: PCR primers for GAPDH and GDNF. Supplementary Table 2: raw data of QPCR results of miR-211 and GDNF of human duodenal biopsy tissue specimens from control and FD groups (n = 20 for each). Supplementary Figure S1: eosinophil and mast cell counts in duodenal tissue specimens from patients with functional dyspepsia and healthy controls. [file 9394381.f1.docx]
